# Supplementary material for: Wood Cutting Board Finishes and Their Effect on Bacterial Growth
Source: MDPI journal article supplement (doi:10.3390/coatings13040752), 2023-04-08
Supplement: s1 [file s1]

# Supplementary Materials: Wood Cutting Board Finishes and Their Effect on Bacterial Growth

Sarath M. Vega Gutierrez <sup>1</sup>, Patricia T. Vega Gutierrez <sup>1</sup>, Joy Waite-Cusic <sup>2</sup> and Seri C. Robinson <sup>1,\*</sup>

<sup>1</sup> Department of Wood Science & Engineering, College of Forestry, Oregon State University, Corvallis, OR 97331, USA; sarathth@yahoo.co.uk (S.M.V.G.); patricia.vega@oregonstate.edu (P.T.V.G.); joy.waite-cusic@oregonstate.edu (J.W.-C.)

<sup>2</sup> Department of Food Science & Technology, College of Agricultural Sciences, Oregon State University, Corvallis, OR 97331, USA

\* Correspondence: seri.robinson@oregonstate.edu

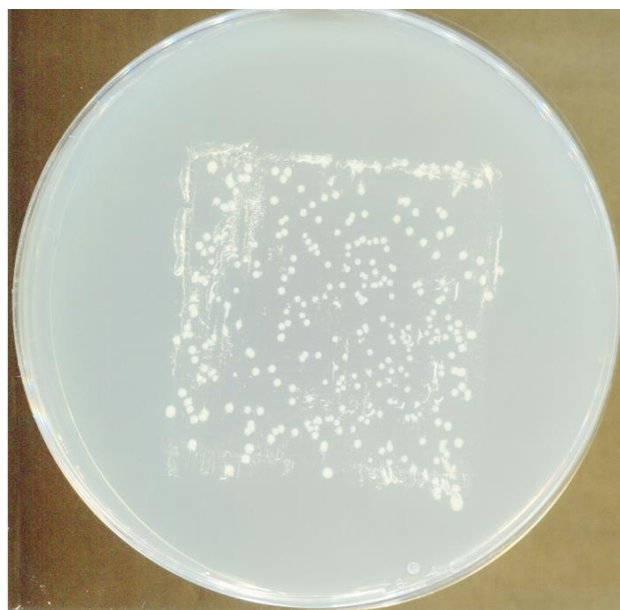

**Figure S1.** Red oak stamp at time 0, with 1 coating of linseed oil, inoculated with listeria.

**Citation:** Vega Gutierrez, S.M.; Vega Gutierrez, P.T.; Waite-Cusic, J.; Robinson, S.C. Wood Cutting Board Finishes and Their Effect on Bacterial Growth. *Coatings* **2023**, *13*, 752. <https://10.3390/coatings13040752>

Academic Editor: Peter Zilm

Received: 7 March 2023

Revised: 1 April 2023

Accepted: 6 April 2023

Published: date

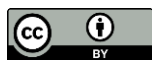

**Copyright:** © 2023 by the authors. Submitted for possible open access publication under the terms and conditions of the Creative Commons Attribution (CC BY) license (<https://creativecommons.org/licenses/by/4.0/>).

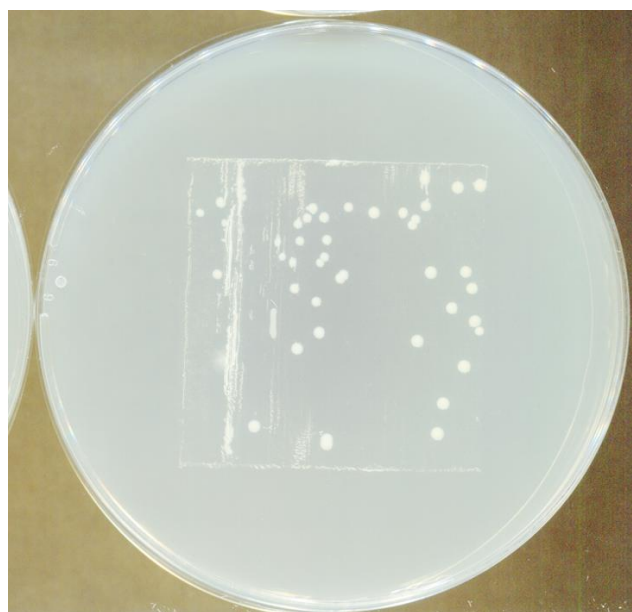

**Figure S2.** Red oak stamp at time 0, 1 coating mineral oil, inoculated with listeria.

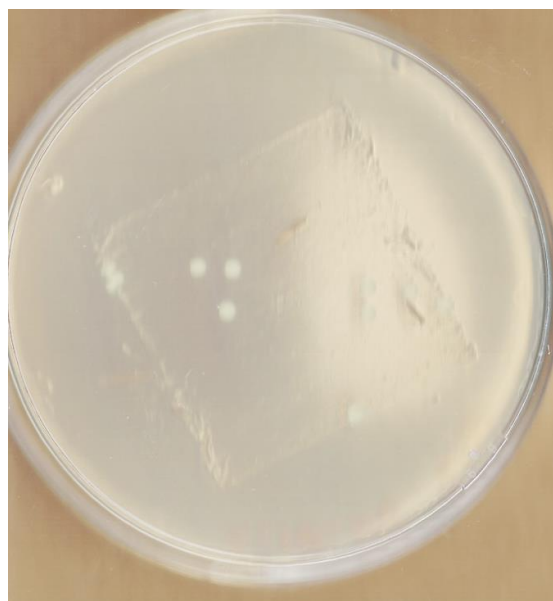

**Figure S3.** Red oak stamps at time 0, no coating, inoculated with listeria.

**Disclaimer/Publisher's Note:** The statements, opinions and data contained in all publications are solely those of the individual author(s) and contributor(s) and not of MDPI and/or the editor(s). MDPI and/or the editor(s) disclaim responsibility for any injury to people or property resulting from any ideas, methods, instructions or products referred to in the content.
